# Supplementary material for: Patient Similarity in Prediction Models Based on Health Data: A Scoping Review
Source: JMIR Med Inform. 2017 Mar 3;5(1):e7. doi: 10.2196/medinform.6730 (PMC5357318; doi:10.2196/medinform.6730)
Supplement: Multimedia Appendix 2 [file medinform_v5i1e7_app2.pdf]

## Multimedia Appendix 2

*Summary of the reviewed articles in terms of methodology (N=22).*

| Authors             | Similarity metric    | Methodology <sup>a</sup>                                                                                                                                                                                                                                                                                                                                            | Neighborhood-based | Cluster-based | Other algorithm | Programming language <sup>b</sup> |
|---------------------|----------------------|---------------------------------------------------------------------------------------------------------------------------------------------------------------------------------------------------------------------------------------------------------------------------------------------------------------------------------------------------------------------|--------------------|---------------|-----------------|-----------------------------------|
| Jurisica et al [16] | Context-based metric | <ol style="list-style-type: none"> <li>1. Retrieving patients based on a context-based metric defined by a user.</li> <li>2. Relaxing the context to retrieve more patients (optional).</li> <li>3. Weighted aggregation of the retrieved outcomes is used for an index patient.</li> </ol>                                                                         | ✓                  |               |                 | NR                                |
| Bobrowski [17]      | Euclidian distance   | <ol style="list-style-type: none"> <li>1. Designing a linear transformation by maximizing within-class compactness and between-class scatteredness.</li> <li>2. Applying the transformation, and executing a <math>k</math>-NN (<math>k=10</math>) algorithm on the transformed data.</li> </ol>                                                                    | ✓                  |               |                 | NR                                |
| Park et al [19]     | Euclidian distance   | <ol style="list-style-type: none"> <li>1. Learning the distribution of distances in the training set.</li> <li>2. Finding the optimum cut-off probability using a grid search.</li> <li>3. Retrieving similar patients within the distance threshold.</li> <li>4. Weighted aggregation of the retrieved patients' outcomes is used for an index patient.</li> </ol> | ✓                  |               |                 | JAVA                              |

| Authors                   | Similarity metric    | Methodology <sup>a</sup>                                                                                                                                                                                                                                                                                                                            | Neighbor hood-based | Cluster -based | Other algorithm | Programmin g language <sup>b</sup> |
|---------------------------|----------------------|-----------------------------------------------------------------------------------------------------------------------------------------------------------------------------------------------------------------------------------------------------------------------------------------------------------------------------------------------------|---------------------|----------------|-----------------|------------------------------------|
| Saeed et al [21]          | Correlation distance | <ol style="list-style-type: none"> <li>1. Applying a discrete wavelet transformation.</li> <li>2. Uniformly quantizing the wavelet coefficients' histogram at each scale to produce wavelet symbols.</li> <li>3. Using IDF map of wavelet symbols as predictors.</li> <li>4. Applying <i>k</i>-NN with majority vote within a threshold.</li> </ol> | ✓                   |                |                 | NR                                 |
| Chattopadhy ay et al [23] | Absolute distance    | <ol style="list-style-type: none"> <li>1. Retrieving a cohort of patients who are similar to a new patient.</li> <li>2. Splitting the retrieved data into cohorts with various risk levels.</li> <li>3. Calculating the relative distance of a new patient from each cohort.</li> <li>4. Assigning the new patient to the closest class.</li> </ol> | ✓                   |                |                 | JAVA                               |

| Authors        | Similarity metric    | Methodology <sup>a</sup>                                                                                                                                                                                                                                                                                                                                                                                                                                                                                                                                                                                                                                                                                                         | Neighbor hood-based | Cluster -based | Other algorithm | Programmin g language <sup>b</sup> |
|----------------|----------------------|----------------------------------------------------------------------------------------------------------------------------------------------------------------------------------------------------------------------------------------------------------------------------------------------------------------------------------------------------------------------------------------------------------------------------------------------------------------------------------------------------------------------------------------------------------------------------------------------------------------------------------------------------------------------------------------------------------------------------------|---------------------|----------------|-----------------|------------------------------------|
| Sun et al [24] | Mahalanobis Distance | <ol style="list-style-type: none"> <li>1. Employing two schemes for deriving predictors:               <ol style="list-style-type: none"> <li>a. Wavelet coefficients: applying a wavelet transformation and deriving top-10 wavelet coefficients.</li> <li>b. Statistic predictors: calculating the mean and variance of two hours mean APB, systolic ABP, SPO<sub>2</sub> and heart rate data.</li> </ol> </li> <li>2. Defining a Mahalanobis distance by solving an optimization problem by minimizing the within-class squared distances and maximizing between-class squared distances.</li> <li>3. Retrieving three most similar patients to an index patient based on the similarity metric learned in step 2.</li> </ol> | ✓                   |                |                 | NR                                 |

| Authors        | Similarity metric    | Methodology <sup>a</sup>                                                                                                                                                                                                                                                                                                                                                                                                                                                                                                                                                                                                                                 | Neighbor hood-based | Cluster -based | Other algorithm | Programmin g language <sup>b</sup> |
|----------------|----------------------|----------------------------------------------------------------------------------------------------------------------------------------------------------------------------------------------------------------------------------------------------------------------------------------------------------------------------------------------------------------------------------------------------------------------------------------------------------------------------------------------------------------------------------------------------------------------------------------------------------------------------------------------------------|---------------------|----------------|-----------------|------------------------------------|
| Sun et al [25] | Mahalanobis Distance | <ol style="list-style-type: none"> <li>1. Imputing the missing data: <ol style="list-style-type: none"> <li>a. Replacing with the mean.</li> <li>b. Using the correlation between sensors and using linear regression imputation.</li> </ol> </li> <li>2. Applying wavelet transformation and deriving top-10 wavelet coefficients.</li> <li>3. Defining a Mahalanobis distance by solving an optimization problem by minimizing the within-class squared distances and maximizing between-class squared distances.</li> <li>4. Retrieving five most similar patients to an index patient based on the similarity metric learned in step two.</li> </ol> | ✓                   |                |                 | NR                                 |

| Authors          | Similarity metric  | Methodology <sup>a</sup>                                                                                                                                                                                                                                                                                                                                                                                                                                                                                                                                                                                                                                                                              | Neighbor hood-based | Cluster -based | Other algorithm | Programmin g language <sup>b</sup> |
|------------------|--------------------|-------------------------------------------------------------------------------------------------------------------------------------------------------------------------------------------------------------------------------------------------------------------------------------------------------------------------------------------------------------------------------------------------------------------------------------------------------------------------------------------------------------------------------------------------------------------------------------------------------------------------------------------------------------------------------------------------------|---------------------|----------------|-----------------|------------------------------------|
| David et al [26] | Euclidian distance | <ol style="list-style-type: none"> <li>1. Assigning random weights to the predictors.</li> <li>2. Selecting neighbors for an index patient using Euclidian distance.</li> <li>3. Applying singular value decomposition to map the data to a lower dimensional space.</li> <li>4. Examining the discriminative power of the assigned weights.</li> <li>5. Repeating steps (1)-(4) to achieve a set of random discriminative weights.</li> <li>6. Combining all confirmed weighting vectors to derive a differential matrix.</li> <li>7. Using the differential matrix to obtain the neighborhood of an index patient.</li> <li>8. Using the weighted aggregation of the neighboring labels.</li> </ol> | ✓                   |                |                 | NR                                 |
| Houeland [27]    | Tree-based metric  | <ol style="list-style-type: none"> <li>1. Generating a forest of randomly grown trees of height five.</li> <li>2. Each tree sorts a patient into one of 16 leaf nodes (buckets).</li> <li>3. Using <math>k</math>-NN (<math>k = 1</math>)—Two patients are said to be similar if they are in the same leaf node for a higher number of trees.</li> </ol>                                                                                                                                                                                                                                                                                                                                              | ✓                   |                |                 | NR                                 |

| Authors         | Similarity metric    | Methodology <sup>a</sup>                                                                                                                                                                                                                                                                                                                                                                                                                                                           | Neighbor hood-based | Cluster -based | Other algorithm | Programmin g language <sup>b</sup> |
|-----------------|----------------------|------------------------------------------------------------------------------------------------------------------------------------------------------------------------------------------------------------------------------------------------------------------------------------------------------------------------------------------------------------------------------------------------------------------------------------------------------------------------------------|---------------------|----------------|-----------------|------------------------------------|
| Wang et al [28] | Mahalanobis Distance | <ol style="list-style-type: none"> <li>1. Learning a Mahalanobis distance for each party by maximizing inter-class compactness and between-class scatteredness.</li> <li>2. Defining a quadratic optimization problem to derive a single optimal distance metric.</li> <li>3. Using <math>k</math>-NN algorithm.</li> </ol>                                                                                                                                                        | ✓                   |                |                 | NR                                 |
| Wang et al [29] | Mahalanobis Distance | <ol style="list-style-type: none"> <li>1. Learning a Mahalanobis distance using the following steps: <ol style="list-style-type: none"> <li>a. For each patient, retrieving <math>k</math> nearest neighboring cases based on the Euclidean distance.</li> <li>b. Solving a local spline regression problem.</li> <li>c. Aggregating local neighborhoods' losses and minimizing the global loss of local spline regressions to derive the precision matrix.</li> </ol> </li> </ol> | ✓                   |                |                 | NR                                 |

| Authors                     | Similarity metric          | Methodology <sup>a</sup>                                                                                                                                                                                                                                                                                                                                                                                                              | Neighbor hood-based | Cluster -based | Other algorithm | Programmin g language <sup>b</sup> |
|-----------------------------|----------------------------|---------------------------------------------------------------------------------------------------------------------------------------------------------------------------------------------------------------------------------------------------------------------------------------------------------------------------------------------------------------------------------------------------------------------------------------|---------------------|----------------|-----------------|------------------------------------|
|                             |                            | 2. Using $k$ -NN ( $k = 5$ ) algorithm.                                                                                                                                                                                                                                                                                                                                                                                               |                     |                |                 |                                    |
| Campillo-Gimenez et al [30] | XOR distance               | <ol style="list-style-type: none"> <li>1. Training an LR model on a part of the training set.</li> <li>2. Using the LR coefficients and outcomes for assigning weights to the predictors and cases, respectively.</li> <li>3. Exploiting a <math>k</math>-NN algorithm with an XOR patient similarity metric.</li> </ol>                                                                                                              | ✓                   |                |                 | R                                  |
| Gottlieb et al [32]         | Various similarity metrics | <ol style="list-style-type: none"> <li>1. Calculating eight similarity metrics between hospitalizations and two similarity majors for ICD codes.</li> <li>2. Combining the metrics into 16 hospitalization-discharge code associations.</li> <li>3. Calculating the score of a potential discharge code for a new patient's hospitalization data.</li> <li>4. Using an LR classifier to distinguish the true associations.</li> </ol> |                     |                | ✓               | MATLAB                             |
| Lowsky et al [33]           | Mahalanobis distance       | <ol style="list-style-type: none"> <li>1. Defining a Mahalanobis distance with precision matrix equals to inverse of the covariance matrix of the training data.</li> <li>2. Retrieving <math>k</math> most similar patients to a new patient.</li> <li>3. Generating the Kaplan-Meier survival curve for the new patient based on</li> </ol>                                                                                         | ✓                   |                |                 | MATLAB                             |

| Authors              | Similarity metric                                  | Methodology <sup>a</sup>                                                                                                                                                                                                                                                                                                                                                                                                                                                                                                                                                                                                                                            | Neighbor hood-based | Cluster -based | Other algorithm | Programmin g language <sup>b</sup> |
|----------------------|----------------------------------------------------|---------------------------------------------------------------------------------------------------------------------------------------------------------------------------------------------------------------------------------------------------------------------------------------------------------------------------------------------------------------------------------------------------------------------------------------------------------------------------------------------------------------------------------------------------------------------------------------------------------------------------------------------------------------------|---------------------|----------------|-----------------|------------------------------------|
|                      |                                                    | the retrieved cases.                                                                                                                                                                                                                                                                                                                                                                                                                                                                                                                                                                                                                                                |                     |                |                 |                                    |
| Hielscher et al [34] | Heterogeneous Euclidean Overlap Metric (HEOM) [27] | <ol style="list-style-type: none"> <li>1. Splitting the dataset based on gender.</li> <li>2. Selecting predictors by Correlation-based Feature Selection algorithm [28].</li> <li>3. Employing <i>k</i>-NN with majority vote and weighting vote for classification</li> </ol>                                                                                                                                                                                                                                                                                                                                                                                      | ✓                   |                |                 | NR                                 |
| Zhang et al [36]     | Jaccard similarity coefficient                     | <ol style="list-style-type: none"> <li>1. Constructing a drug similarity matrix by using chemical structure extracted from PubChem, and drug target protein information extracted from DrugBank.</li> <li>2. Building patient-drug similarity matrix using the Jaccard similarity coefficient between ICD9 diagnosis codes of patients and ICD9-format drug indications from MEDI database</li> <li>3. Constructing patient similarity network using Jaccard similarity coefficient on ICD9 diagnosis codes.</li> <li>4. Concatenating the three matrices and employing label propagation method to infer the efficiency of a drug for an index patient.</li> </ol> |                     |                | ✓               | NR                                 |
| Henriques et al [37] | Coefficients' signs-based distance                 | <ol style="list-style-type: none"> <li>1. Representing a signal by Haar wavelet coefficients.</li> <li>2. Defining a similarity</li> </ol>                                                                                                                                                                                                                                                                                                                                                                                                                                                                                                                          | ✓                   |                |                 | NR                                 |

| Authors               | Similarity metric        | Methodology <sup>a</sup>                                                                                                                                                                                                                                                                                                                                                                                                                        | Neighbor hood-based | Cluster -based | Other algorithm | Programmin g language <sup>b</sup> |
|-----------------------|--------------------------|-------------------------------------------------------------------------------------------------------------------------------------------------------------------------------------------------------------------------------------------------------------------------------------------------------------------------------------------------------------------------------------------------------------------------------------------------|---------------------|----------------|-----------------|------------------------------------|
|                       |                          | metric based on the sign of each coefficient.<br><br>3. Employing <i>k</i> -NN for prediction                                                                                                                                                                                                                                                                                                                                                   |                     |                |                 |                                    |
| Lee et al [39]        | Cosine similarity metric | <ol style="list-style-type: none"> <li>1. Calculating all pair-wise cosine patient similarity metric between an index patient and patients in training set</li> <li>2. Ranking the patients based on the similarity values</li> <li>3. Using <i>k</i> most similar patients to train 3 prediction models: <ol style="list-style-type: none"> <li>a) Majority vote (<i>k</i>-NN)</li> <li>b) LR</li> <li>c) Decision tree</li> </ol> </li> </ol> | ✓                   |                |                 | R                                  |
| Ng et al [40]         | Mahalanobis distance     | <ol style="list-style-type: none"> <li>1. Supervised learning of a Mahalanobis patient similarity metric.</li> <li>2. Computing patient similarity and identifying a cohort of <i>k</i> similar patients.</li> <li>3. Selecting predictors.</li> <li>4. Training an LR on the cohort for risk prediction.</li> </ol>                                                                                                                            | ✓                   |                |                 | NR                                 |
| Panahiazar et al [41] | Mahalanobis distance     | <ol style="list-style-type: none"> <li>1. Splitting patients based on their response to a medication (good or poor).</li> <li>2. Clustering the patients using two approaches:</li> </ol>                                                                                                                                                                                                                                                       |                     | ✓              |                 | NR                                 |

| Authors   | Similarity metric   | Methodology <sup>a</sup>                                                                                                                                                                                                                                                                                                                                                                                                                   | Neighbor hood-based | Cluster -based | Other algorithm | Programmin g language <sup>b</sup> |
|-----------|---------------------|--------------------------------------------------------------------------------------------------------------------------------------------------------------------------------------------------------------------------------------------------------------------------------------------------------------------------------------------------------------------------------------------------------------------------------------------|---------------------|----------------|-----------------|------------------------------------|
|           |                     | <ul style="list-style-type: none"> <li>a. Unsupervise d clustering: <i>k</i>-means and hierarchical clustering.</li> <li>b. Supervised clustering with medications as labels.</li> </ul> <ul style="list-style-type: none"> <li>3. Measuring the similarity of an index patient to the mean of each cluster using a Mahalanobis distance.</li> <li>4. Considering the medication of the most similar cluster for a new patient.</li> </ul> |                     |                |                 |                                    |
| Wang [42] | Tree-based distance | <ul style="list-style-type: none"> <li>1. Constructing a tree by optimizing two-term objective function: <ul style="list-style-type: none"> <li>a. A human expert's knowledge term.</li> <li>b. A data mining based term.</li> </ul> </li> <li>2. Using the tree to index patient profiles and then rapidly retrieve the nearest neighbors to a new patient.</li> </ul>                                                                    |                     |                | ✓               | Python                             |

| Authors         | Similarity metric                         | Methodology <sup>a</sup>                                                                                                                                                                                                                                                                                      | Neighbor hood-based | Cluster -based | Other algorithm | Programmin g language <sup>b</sup> |
|-----------------|-------------------------------------------|---------------------------------------------------------------------------------------------------------------------------------------------------------------------------------------------------------------------------------------------------------------------------------------------------------------|---------------------|----------------|-----------------|------------------------------------|
| Wang et al [43] | Euclidean Distance in a transformed space | <ol style="list-style-type: none"> <li>1. Learning a transformed Euclidean distance by optimizing two-term objective function: <ol style="list-style-type: none"> <li>a. Human expert's knowledge term.</li> <li>b. Data mining based term.</li> </ol> </li> <li>2. Using a <i>k</i>-NN algorithm.</li> </ol> | ✓                   |                |                 | MATLAB                             |

<sup>a</sup> Methodology: ABP: arterial blood pressure; ICD: International Classification of Diseases;

IDF: inverse document frequency; k-NN: k-nearest neighbor; LR: logistic regression; SPO2:

saturation of peripheral oxygen; XOR: exclusive or.

<sup>b</sup> NR: not reported.
